# Supplementary material
Source: Springer Nature journal article supplement (https://mijn.bsl.nl/resource/supplementary/13047_2009_115_MOESM4_ESM.pdf/7110078)

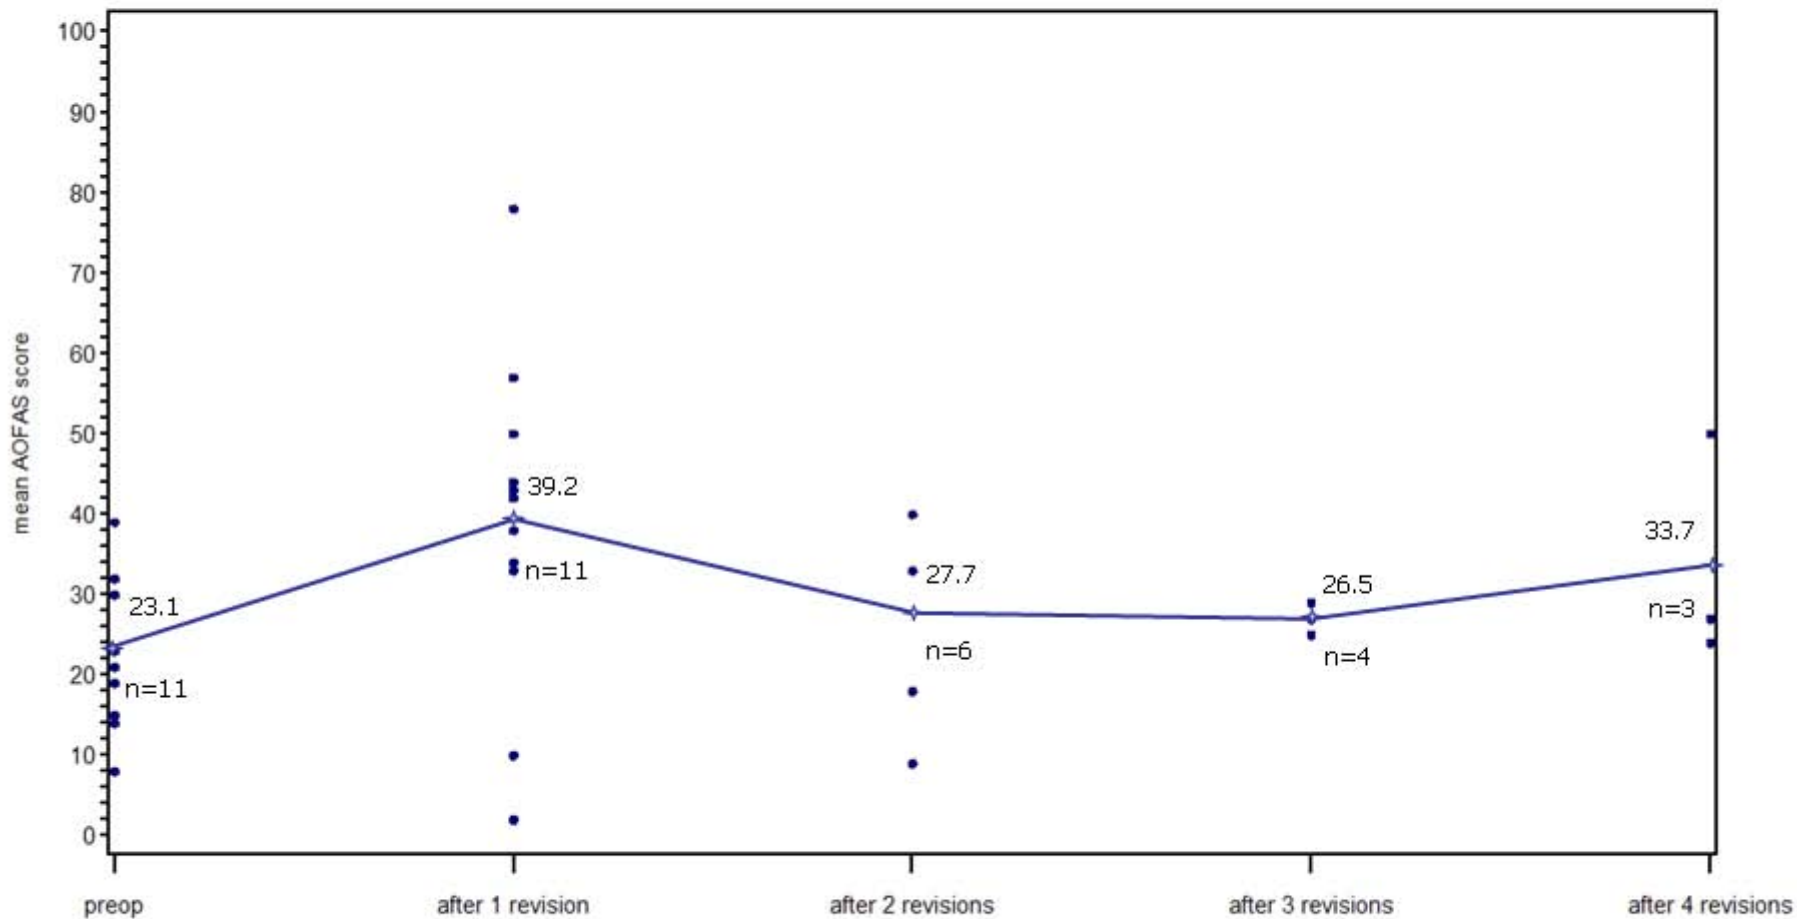

Supplement: MOESM4 [file 7110078]
